# Supplementary material for: Serum Proteomic Profile of Asthmatic Patients after Six Months of Benralizumab and Mepolizumab Treatment
Source: MDPI journal article supplement (doi:10.3390/biomedicines10040761), 2022-03-24
Supplement: s1 [file s1]

| Spot N. | Protein description <sup>a</sup>  | Uniprot ID/name <sup>b</sup> | AC     | Gene name | MetaCore name                  | Mascot search results |       |                         |                       |
|---------|-----------------------------------|------------------------------|--------|-----------|--------------------------------|-----------------------|-------|-------------------------|-----------------------|
|         |                                   |                              |        |           |                                | Theoretical pI-MW     | Score | No. of matched peptides | Sequence coverage (%) |
| 1       | Alpha-2-macroglobulin             | A2MG_HUMAN                   | P01023 | A2M       | A2M                            | 6.03-164613           | 247   | 25/30                   | 18                    |
| 2       | Alpha-2-macroglobulin             | A2MG_HUMAN                   | P01023 | A2M       | A2M                            | 6.03-164613           | 252   | 24/26                   | 17                    |
| 3       | Plasminogen                       | PLMN_HUMAN                   | P00747 | PLG       | Plasminogen                    | 7.04-93247            | 85    | 10/20                   | 14                    |
| 4       | Plasminogen                       | PLMN_HUMAN                   | P00747 | PLG       | Plasminogen                    | 7.04-93247            | 115   | 11/19                   | 18                    |
| 5       | Plasminogen                       | PLMN_HUMAN                   | P00747 | PLG       | Plasminogen                    | 7.04-93247            | 260   | 22/26                   | 28                    |
| 7       | Complement factor B               | CFAB_HUMAN                   | P00751 | CFB       | Factor B, Factor Ba, Factor Bb | 6.67-86847            | 233   | 18/22                   | 29                    |
| 8       | Complement factor B               | CFAB_HUMAN                   | P00751 | CFB       | Factor B, Factor Ba, Factor Bb | 6.67-86847            | 310   | 27/37                   | 41                    |
| 9       | Complement factor B               | CFAB_HUMAN                   | P00751 | CFB       | Factor B, Factor Ba, Factor Bb | 6.67-86847            | 266   | 22/28                   | 3                     |
| 10      | Serotransferrin                   | TRFE_HUMAN                   | P02787 | TF        | Trasferrin, Holotrasferrin     | 6.81-79294            | 96    | 9/12                    | 12                    |
| 11      | Serotransferrin                   | TRFE_HUMAN                   | P02787 | TF        | Trasferrin, Holotrasferrin     | 6.81-79294            | 411   | 31/35                   | 43                    |
| 13      | Serotransferrin                   | TRFE_HUMAN                   | P02787 | TF        | Trasferrin, Holotrasferrin     | 6.81-79294            | 402   | 37/55                   | 47                    |
| 14      | Albumin                           | ALBU_HUMAN                   | P02768 | ALB       | Albumin                        | 5.92-71317            | 106   | 5/9                     | 16                    |
| 15      | Albumin                           | ALBU_HUMAN                   | P02768 | ALB       | Albumin                        | 5.92-71317            | 252   | 23/36                   | 34                    |
| 16      | Albumin                           | ALBU_HUMAN                   | P02768 | ALB       | Albumin                        | 5.92-71317            | 92    | 8/13                    | 13                    |
| 18      | Complement factor B               | CFAB_HUMAN                   | P00751 | CFB       | Factor B, Factor Ba, Factor Bb | 6.67-86847            | 104   | 11/20                   | 17                    |
| 19      | Albumin                           | ALBU_HUMAN                   | P02768 | ALB       | Albumin                        | 5.92-71317            | 345   | 29/37                   | 43                    |
| 20      | Albumin                           | ALBU_HUMAN                   | P02768 | ALB       | Albumin                        | 5.92-71317            | 71    | 5/6                     | 9                     |
| 21      | Albumin                           | ALBU_HUMAN                   | P02768 | ALB       | Albumin                        | 5.92-71317            | 297   | 25/33                   | 41                    |
| 22      | Leucine-rich alpha-2-glycoprotein | A2GL_HUMAN                   | P02750 | LRG1      | LRG                            | 6.45-38382            | 149   | 9/11                    | 27                    |
| 24      | Albumin                           | ALBU_HUMAN                   | P02768 | ALB       | Albumin                        | 5.92-71317            | 347   | 27/32                   | 42                    |
| 27      | Albumin                           | ALBU_HUMAN                   | P02768 | ALB       | Albumin                        | 5.92-71317            | 253   | 20/24                   | 26                    |
| 28      | Albumin Fragment N                | ALBU_HUMAN                   | P02768 | ALB       | Albumin                        | 5.92-71317            | 112   | 10/15                   | 15                    |
| 29      | Albumin Fragment N                | ALBU_HUMAN                   | P02768 | ALB       | Albumin                        | 5.92-71317            | 104   | 10/16                   | 16                    |
| 30      | Immunoglobulin lambda constant 2  | IGLC2_HUMAN                  | P0DOY2 | IGLC2     | LAC2                           | 6.92-11458            | 51    | 3/10                    | 46                    |
| 34      | Apolipoprotein C-III              | APOC3_HUMAN                  | P02656 | APOC3     | HDL, APOC3                     | 5.23-10845            | 71    | 4/10                    | 3                     |
| 35      | Apolipoprotein C-III              | APOC3_HUMAN                  | P02656 | APOC3     | HDL, APOC3                     | 5.23-10845            | 73    | 4/10                    | 45                    |

|    |                                  |             |        |          |                                |             |     |       |    |
|----|----------------------------------|-------------|--------|----------|--------------------------------|-------------|-----|-------|----|
| 37 | Plasminogen                      | PLMN_HUMAN  | P00747 | PLG      | Plasminogen                    | 7.04-93247  | 191 | 17/25 | 26 |
| 38 | Plasminogen                      | PLMN_HUMAN  | P00747 | PLG      | Plasminogen                    | 7.04-93247  | 301 | 25/32 | 35 |
| 40 | Albumin                          | ALBU_HUMAN  | P02768 | ALB      | Albumin                        | 5.92-71317  | 326 | 24/25 | 35 |
| 41 | Alpha-2-macroglobulin            | A2MG_HUMAN  | P01023 | A2M      | A2M                            | 6.03-164613 | 325 | 29/29 | 24 |
| 42 | Plasminogen                      | PLMN_HUMAN  | P00747 | PLG      | Plasminogen                    | 7.04-93247  | 104 | 11/22 | 2  |
| 43 | Complement factor B              | CFAB_HUMAN  | P00751 | CFB      | Factor B, Factor Ba, Factor Bb | 6.67-86847  | 83  | 7/11  | 13 |
| 44 | Complement factor B              | CFAB_HUMAN  | P00751 | CFB      | Factor B, Factor Ba, Factor Bb | 6.67-86847  | 351 | 27/33 | 44 |
| 45 | Gelsolin                         | GELS_HUMAN  | P06396 | GSN      | Gelsolin                       | 5.90-86043  | 286 | 24/33 | 4  |
| 46 | Albumin                          | ALBU_HUMAN  | P02768 | ALB      | Albumin                        | 5.92-71317  | 364 | 28/34 | 5  |
| 48 | Albumin                          | ALBU_HUMAN  | P02768 | ALB      | Albumin                        | 5.92-71317  | 230 | 17/20 | 28 |
| 49 | Albumin                          | ALBU_HUMAN  | P02768 | ALB      | Albumin                        | 5.92-71317  | 317 | 25/32 | 44 |
| 51 | Albumin Fragment C               | ALBU_HUMAN  | P02768 | ALB      | Albumin                        | 5.92-71317  | 253 | 22/31 | 37 |
| 52 | Albumin                          | ALBU_HUMAN  | P02768 | ALB      | Albumin                        | 5.92-71317  | 166 | 11/12 | 18 |
| 53 | Albumin                          | ALBU_HUMAN  | P02768 | ALB      | Albumin                        | 5.92-71317  | 246 | 17/18 | 26 |
| 55 | Transthyretin                    | TTHY_HUMAN  | P02766 | TTR      | Transthyretin                  | 5.52-15991  | 184 | 5/13  | 69 |
| 56 | Apolipoprotein C-II              | APOC2_HUMAN | P02655 | APOC2    | HDL, APOC2                     | 4.72-11277  | 88  | 10/20 | 47 |
| 57 | Ceruloplasmin                    | CERU_HUMAN  | P00450 | CP       | Ceruloplasmin                  | 5.44-122983 | 111 | 11/16 | 14 |
| 61 | Alpha-1-antichymotrypsin +       | AACT_HUMAN  | P01011 | SERPINA3 | SERPINA3 (ACT)                 | 5.33-47792  | 182 | 19/35 | 34 |
|    | Vitronectin                      | VTNC_HUMAN  | P04004 | VTN      | Vitronectin                    | 5.55-55069  | 82  | 10/35 | 16 |
| 64 | Albumin                          | ALBU_HUMAN  | P02768 | ALB      | Albumin                        | 5.92-71317  | 82  | 7/10  | 10 |
| 65 | Albumin                          | ALBU_HUMAN  | P02768 | ALB      | Albumin                        | 5.92-71317  | 84  | 8/13  | 10 |
| 67 | Albumin Fragment C               | ALBU_HUMAN  | P02768 | ALB      | Albumin                        | 5.92-71317  | 184 | 15/21 | 28 |
| 69 | Immunoglobulin lambda constant 2 | IGLC2_HUMAN | P0DOY2 | IGLC2    | LAC2                           | 6.92-11458  | 129 | 7/15  | 66 |
| 70 | Ceruloplasmin                    | CERU_HUMAN  | P00450 | CP       | Ceruloplasmin                  | 5.44-122983 | 227 | 21/26 | 23 |
| 71 | Alpha-1-antichymotrypsin         | AACT_HUMAN  | P01011 | SERPINA3 | SERPINA3 (ACT)                 | 5.33-47792  | 116 | 9/15  | 25 |
| 73 | Apolipoprotein A-I               | APOA1_HUMAN | P02647 | APOA1    | HDL, ApoA1                     | 5.56-30759  | 202 | 14/20 | 4  |
| 74 | Alpha-1-antichymotrypsin         | AACT_HUMAN  | P01011 | SERPINA3 | SERPINA3 (ACT)                 | 5.33-47792  | 192 | 15/23 | 35 |
| 75 | Albumin                          | ALBU_HUMAN  | P02768 | ALB      | Albumin                        | 5.92-71317  | 115 | 10/15 | 15 |
| 76 | Albumin Fragment C               | ALBU_HUMAN  | P02768 | ALB      | Albumin                        | 5.92-71317  | 268 | 20/24 | 31 |
| 78 | Transthyretin                    | TTHY_HUMAN  | P02766 | TTR      | Transthyretin                  | 5.52-15991  | 94  | 5/10  | 52 |
| 79 | Apolipoprotein A-I               | APOA1_HUMAN | P02647 | APOA1    | HDL, ApoA1                     | 5.56-30759  | 264 | 21/30 | 55 |
| 81 | Immunoglobulin J chain           | IGJ_HUMAN   | P01591 | JCHAIN   | IgJ                            | 5.12-18543  | 82  | 5/9   | 29 |
| 82 | Transthyretin                    | TTHY_HUMAN  | P02766 | TTR      | Transthyretin                  | 5.52-15991  | 104 | 5/7   | 44 |

**Supplementary Table S2:** Protein identification by mass spectrometry, showing spot numbers corresponding to Figure 1 and Table S-1, protein names, UniProt names, accession numbers and gene names, MetaCore names, theoretical pI and MW and Mascot Search Results (Score, Matched peptides, Coverage%).
