# Supplementary material for: Serum Proteomic Profile of Asthmatic Patients after Six Months of Benralizumab and Mepolizumab Treatment
Source: MDPI journal article supplement (doi:10.3390/biomedicines10040761), 2022-03-24
Supplement: s1 [file s1]

## Benralizumab Timepoints

| # | Network                                                                                | GO processes                                                                                                                                                                                                                                                                                     | Total nodes | Seed nodes | p-Value  | zScore | gScore |
|---|----------------------------------------------------------------------------------------|--------------------------------------------------------------------------------------------------------------------------------------------------------------------------------------------------------------------------------------------------------------------------------------------------|-------------|------------|----------|--------|--------|
| 1 | Angiostatin, Plasmin, PPAR-gamma, PLAUP (UPA), RelA (p65 NF-kB subunit)                | response to nutrient (58.8%; 1.194e-13), fibrinolysis (29.4%; 5.311e-12), response to nutrient levels (64.7%; 1.028e-11), response to extracellular stimulus (64.7%; 1.781e-11), negative regulation of blood coagulation (35.3%; 2.878e-11)                                                     | 21          | 9          | 5,13E-35 | 275,81 | 275,81 |
| 2 | Albumin, NANOG, SOX2, GATA-4, c-Myc                                                    | gastrulation (44.0%; 2.684e-15), formation of primary germ layer (40.0%; 3.406e-15), positive regulation of cellular biosynthetic process (76.0%; 1.048e-13), positive regulation of biosynthetic process (76.0%; 1.527e-13), embryo development (64.0%; 8.385e-13)                              | 25          | 9          | 6,23E-34 | 246,69 | 246,69 |
| 3 | APOA1, SR-BI, S1P3 receptor, S1P1 receptor, Pre beta-1 HDL lipids extracellular region | high-density lipoprotein particle remodeling (44.8%; 2.076e-30), plasma lipoprotein particle remodeling (48.3%; 3.007e-30), protein-lipid complex remodeling (48.3%; 3.007e-30), protein-containing complex remodeling (48.3%; 1.133e-29), organic hydroxy compound transport (62.1%; 3.698e-29) | 41          | 9          | 1,6E-32  | 211,53 | 211,53 |
| 4 | Transthyretin, E2F1, TCF7L2 (TCF4), Myelin basic protein, 4E-BP2                       | response to endogenous stimulus (75.0%; 3.563e-21), regulation of multicellular organismal process (82.5%; 1.279e-19), response to hormone (62.5%; 2.295e-19), response to nutrient levels (52.5%; 1.386e-18), response to extracellular stimulus (52.5%; 3.908e-18)                             | 48          | 9          | 4,16E-31 | 179,9  | 179,9  |
| 5 | SERPINA3 (ACT), Oncostatin M, BMP7, IL-6, Thrombopoietin                               | cellular response to cytokine stimulus (70.0%; 2.829e-30), cytokine-mediated signaling pathway (60.0%; 1.134e-29), response to cytokine (70.0%; 1.804e-28), cellular response to organic substance (80.0%; 1.221e-23), cellular response to interleukin-6 (26.0%; 4.311e-22)                     | 52          | 8          | 6,57E-27 | 153,5  | 153,5  |
| 6 | Ceruloplasmin, IL-1 beta, AP-1, c-Jun, TAK1(MAP3K7)                                    | activation of MAPK activity (45.0%; 1.508e-13), positive regulation of MAP kinase activity (45.0%; 5.515e-12), MAPK cascade (50.0%; 8.857e-12), positive regulation of MAPK cascade (55.0%; 1.108e-11), activation of protein kinase activity (45.0%; 5.677e-11)                                 | 20          | 7          | 2,46E-26 | 214,51 | 214,51 |

## Mepolizumab Timepoints

| Network                                                                                | GO processes                                                                                                                                                                                                                                                                                           | Total nodes | Seed nodes | p-Value   | zScore | gScore |
|----------------------------------------------------------------------------------------|--------------------------------------------------------------------------------------------------------------------------------------------------------------------------------------------------------------------------------------------------------------------------------------------------------|-------------|------------|-----------|--------|--------|
| Angiostatin, Plasmin, PPAR-gamma, PLAUP (UPA), RelA (p65 NF-kB subunit)                | response to nutrient (58.8%; 1.194e-13), fibrinolysis (29.4%; 5.311e-12), response to nutrient levels (64.7%; 1.028e-11), response to extracellular stimulus (64.7%; 1.781e-11), negative regulation of blood coagulation (35.3%; 2.878e-11)                                                           | 21          | 9          | 5,280E-36 | 302,14 | 302,14 |
| Albumin, NANOG, SOX2, GATA-4, KLF4                                                     | gastrulation (45.8%; 1.519e-15), formation of primary germ layer (41.7%; 2.059e-15), embryo development (66.7%; 3.242e-13), response to endogenous stimulus (75.0%; 3.347e-13), tissue morphogenesis (54.2%; 5.284e-13)                                                                                | 24          | 8          | 1,120E-30 | 245,16 | 245,16 |
| APOA1, SR-BI, S1P3 receptor, S1P1 receptor, Pre beta-1 HDL lipids extracellular region | plasma lipoprotein particle remodeling (48.1%; 4.179e-28), protein-lipid complex remodeling (48.1%; 4.179e-28), high-density lipoprotein particle remodeling (44.4%; 5.027e-28), organic hydroxy compound transport (63.0%; 9.344e-28), protein-containing complex remodeling (48.1%; 1.414e-27)       | 39          | 7          | 2,160E-25 | 185,77 | 185,77 |
| SERPINA3 (ACT), Oncostatin M, BMP7, IL-6, Thrombopoietin                               | cellular response to cytokine stimulus (71.4%; 9.055e-31), cytokine-mediated signaling pathway (61.2%; 4.712e-30), response to cytokine (71.4%; 5.827e-29), cellular response to organic substance (81.6%; 2.880e-24), regulation of cell population proliferation (71.4%; 2.241e-23)                  | 51          | 7          | 6,400E-24 | 148,6  | 148,6  |
| Ceruloplasmin, IL-1 beta, AP-1, c-Jun, TAK1(MAP3K7)                                    | activation of MAPK activity (47.4%; 8.365e-14), positive regulation of MAP kinase activity (47.4%; 3.074e-12), MAPK cascade (52.6%; 4.525e-12), positive regulation of MAPK cascade (57.9%; 5.147e-12), response to stress (94.7%; 2.612e-11)                                                          | 19          | 6          | 6,540E-23 | 206,65 | 206,65 |
| Pre beta-1 HDL lipids extracellular region, SR-BI, S1P1 receptor, S1P3 receptor, APOA1 | protein-lipid complex remodeling (85.7%; 1.016e-30), plasma lipoprotein particle remodeling (85.7%; 1.016e-30), protein-containing complex remodeling (85.7%; 3.102e-30), high-density lipoprotein particle remodeling (78.6%; 9.674e-30), plasma lipoprotein particle organization (85.7%; 8.638e-29) | 23          | 5          | 5,040E-19 | 182,06 | 182,06 |

|    |                                                                                                                                                                                                |                                                                                                                                                                                                                                                                                                                   |    |   |          |        |        |                                                                                                                                                                                                |                                                                                                                                                                                                                                                                                                                   |    |   |           |        |        |
|----|------------------------------------------------------------------------------------------------------------------------------------------------------------------------------------------------|-------------------------------------------------------------------------------------------------------------------------------------------------------------------------------------------------------------------------------------------------------------------------------------------------------------------|----|---|----------|--------|--------|------------------------------------------------------------------------------------------------------------------------------------------------------------------------------------------------|-------------------------------------------------------------------------------------------------------------------------------------------------------------------------------------------------------------------------------------------------------------------------------------------------------------------|----|---|-----------|--------|--------|
| 7  | SAR1A, Sec23, PKC, MTP, APOA4                                                                                                                                                                  | regulation of lipid localization (53.1%; 1.031e-24), plasma lipoprotein particle remodeling (37.5%; 2.442e-24), protein-lipid complex remodeling (37.5%; 2.442e-24), lipoprotein transport (34.4%; 4.735e-24), lipoprotein localization (34.4%; 6.590e-24)                                                        | 56 | 7 | 1,02E-23 | 146,28 | 146,28 | LRG, G-CSF, STAT3, STAT5, JAK1                                                                                                                                                                 | cellular response to interleukin-6 (50.0%; 8.231e-13), response to interleukin-6 (50.0%; 1.643e-12), interleukin-6-mediated signaling pathway (41.7%; 4.827e-12), receptor signaling pathway via JAK-STAT (41.7%; 6.952e-11), receptor signaling pathway via STAT (41.7%; 7.570e-11)                              | 12 | 4 | 1,240E-15 | 173,35 | 173,35 |
| 8  | Pre beta-1 HDL lipids extracellular region, SR-BI, S1P1 receptor, S1P3 receptor, APOA1                                                                                                         | protein-lipid complex remodeling (85.7%; 1.016e-30), plasma lipoprotein particle remodeling (85.7%; 1.016e-30), protein-containing complex remodeling (85.7%; 3.102e-30), high-density lipoprotein particle remodeling (78.6%; 9.674e-30), plasma lipoprotein particle organization (85.7%; 8.638e-29)            | 23 | 5 | 1,44E-18 | 166,19 | 166,19 | S1P1 receptor, S1P3 receptor, APOA1, Pre beta-1 HDL, PERM                                                                                                                                      | protein-lipid complex remodeling (81.8%; 7.797e-23), plasma lipoprotein particle remodeling (81.8%; 7.797e-23), protein-containing complex remodeling (81.8%; 1.758e-22), plasma lipoprotein particle organization (81.8%; 2.006e-21), high-density lipoprotein particle remodeling (72.7%; 2.636e-21)            | 14 | 3 | 1,550E-11 | 130,01 | 130,01 |
| 9  | APOC3, LPL, Biglycan proteoglycan, Decorin proteoglycan, Versican proteoglycan                                                                                                                 | chylomicron remodeling (53.3%; 2.792e-20), triglyceride-rich lipoprotein particle remodeling (53.3%; 6.243e-20), protein-lipid complex remodeling (53.3%; 4.357e-18), plasma lipoprotein particle remodeling (53.3%; 4.357e-18), regulation of plasma lipoprotein particle levels (60.0%; 5.433e-18)              | 21 | 4 | 2,72E-14 | 122,57 | 122,57 | Pre beta-1 HDL lipids extracellular region, Pre beta-1 HDL lipids + Cholesterol + Phospholipid = HDL nascent lipids, HDL nascent lipids extracellular region, Cholesterol extracellular region | cholesterol import (100.0%; 2.069e-10), sterol import (100.0%; 2.069e-10), negative regulation of cell adhesion molecule production (100.0%; 2.547e-10), negative regulation of heterotypic cell-cell adhesion (100.0%; 5.184e-10), regulation of cell-cell adhesion involved in gastrulation (100.0%; 5.184e-10) | 7  | 3 | 2,820E-13 | 225,21 | 225,21 |
| 10 | S1P1 receptor, S1P3 receptor, APOA1, Pre beta-1 HDL, PERM                                                                                                                                      | protein-lipid complex remodeling (81.8%; 7.797e-23), plasma lipoprotein particle remodeling (81.8%; 7.797e-23), protein-containing complex remodeling (81.8%; 1.758e-22), plasma lipoprotein particle organization (81.8%; 2.006e-21), high-density lipoprotein particle remodeling (72.7%; 2.636e-21)            | 14 | 3 | 2,78E-11 | 118,68 | 118,68 | APOC3, LPL, Decorin proteoglycan, Biglycan proteoglycan, Versican proteoglycan                                                                                                                 | chylomicron remodeling (53.8%; 7.041e-18), triglyceride-rich lipoprotein particle remodeling (53.8%; 1.406e-17), lipoprotein metabolic process (69.2%; 3.237e-17), regulation of plasma lipoprotein particle levels (61.5%; 3.097e-16), protein-lipid complex remodeling (53.8%; 5.500e-16)                       | 19 | 2 | 2,810E-07 | 70,75  | 70,75  |
| 11 | Pre beta-1 HDL lipids extracellular region, Pre beta-1 HDL lipids + Cholesterol + Phospholipid = HDL nascent lipids, HDL nascent lipids extracellular region, Cholesterol extracellular region | cholesterol import (100.0%; 2.069e-10), sterol import (100.0%; 2.069e-10), negative regulation of cell adhesion molecule production (100.0%; 2.547e-10), negative regulation of heterotypic cell-cell adhesion (100.0%; 5.184e-10), regulation of cell-cell adhesion involved in gastrulation (100.0%; 5.184e-10) | 7  | 3 | 5,06E-13 | 205,58 | 205,58 |                                                                                                                                                                                                |                                                                                                                                                                                                                                                                                                                   |    |   |           |        |        |

**Supplementary Table S3:** MetaCore Analysis: Comparison of canonical pathways by gene ontology differential proteins in benralizumab (grey) and mepolizumab (black) time points. Red square indicates the canonical pathway involving transthyretin, which was found differential only in benralizumab time points analysis.
