# Supplementary material for: Serum Proteomic Profile of Asthmatic Patients after Six Months of Benralizumab and Mepolizumab Treatment
Source: MDPI journal article supplement (doi:10.3390/biomedicines10040761), 2022-03-24
Supplement: s1 [file s1]

| Spot n° | Protein<br><br>name               | Kruskal-Wallis and<br>Dunn'test |                  | Mean ± SD   |             |             |             |             |             | Ratio        |               |                |                |                |              |              |               |              |               |               |               |               |
|---------|-----------------------------------|---------------------------------|------------------|-------------|-------------|-------------|-------------|-------------|-------------|--------------|---------------|----------------|----------------|----------------|--------------|--------------|---------------|--------------|---------------|---------------|---------------|---------------|
|         |                                   | p-value                         | adj. p-<br>value | CTRL        | T0          | T1M         | T1B         | T6M         | T6B         | CTRLvsT0     | CTRL<br>vsT1M | CTRL vs<br>T1B | CTRL vs<br>T6M | CTRL vs<br>T6B | T0 vs<br>T1M | T0 vs<br>T1B | T0 vs<br>T6M  | T0 vs<br>T6B | T1M vs<br>T6M | T1M vs<br>T1B | T1B vs<br>T6B | T6M vs<br>T6B |
| 1       | Alpha-2-macroglobulin             | 1,01E-03                        | 5,02E-03         | 0,02 ± 0,02 | 0,11 ± 0,04 | 0,14 ± 0,09 | 0,1 ± 0,06  | 0,05 ± 0,04 | 0,08 ± 0,02 | <b>0,113</b> | <b>0,083</b>  | <b>0,128</b>   | <b>0,235</b>   | <b>0,145</b>   | 0,735        | 1,138        | <b>2,092</b>  | <b>0,440</b> | <b>2,847</b>  | 1,549         | 1,132         | 0,616         |
| 2       | Alpha-2-macroglobulin             | 8,45E-03                        | 2,46E-02         | 0,01 ± 0,02 | 0,08 ± 0,03 | 0,12 ± 0,07 | 0,08 ± 0,05 | 0,07 ± 0,03 | 0,06 ± 0,04 | <b>0,122</b> | <b>0,084</b>  | <b>0,124</b>   | <b>0,156</b>   | <b>0,181</b>   | 0,685        | 1,011        | 1,278         | 0,572        | 1,866         | 1,477         | 1,464         | 1,159         |
| 3       | Plasminogen                       | 2,72E-04                        | 1,96E-03         | 0,01 ± 0,01 | 0,02 ± 0,02 | 0,02 ± 0,01 | 0,03 ± 0,01 | 0,02 ± 0,01 | 0,03 ± 0,01 | <b>0,142</b> | <b>0,211</b>  | <b>0,095</b>   | <b>0,135</b>   | <b>0,100</b>   | 1,484        | 0,667        | 0,951         | <b>0,437</b> | 0,640         | <b>0,450</b>  | 1,054         | 0,740         |
| 4       | Plasminogen                       | 8,72E-04                        | 1,74E-02         | 0,01 ± 0,01 | 0,03 ± 0,02 | 0,05 ± 0,04 | 0,04 ± 0,02 | 0,03 ± 0,01 | 0,04 ± 0,02 | <b>0,215</b> | <b>0,159</b>  | <b>0,183</b>   | <b>0,260</b>   | <b>0,197</b>   | 0,740        | 0,853        | 1,209         | 0,556        | 1,634         | 1,153         | 1,073         | 0,757         |
| 5       | Plasminogen                       | 5,54E-03                        | 1,81E-02         | 0,02 ± 0,01 | 0,04 ± 0,02 | 0,04 ± 0,03 | 0,03 ± 0,01 | 0,03 ± 0,01 | 0,03 ± 0,01 | <b>0,321</b> | <b>0,264</b>  | <b>0,385</b>   | <b>0,497</b>   | <b>0,376</b>   | 0,823        | 1,199        | 1,549         | 0,730        | 1,883         | 1,457         | 0,978         | 0,757         |
| 6       |                                   | 1,09E-04                        | 1,05E-03         | 0,01 ± 0,01 | 0,02 ± 0,02 | 0,02 ± 0,01 | 0,03 ± 0,01 | 0,02 ± 0,01 | 0,02 ± 0,01 | <b>0,433</b> | <b>0,456</b>  | <b>0,307</b>   | 0,601          | <b>0,455</b>   | 1,053        | 0,708        | 1,388         | 0,598        | 1,318         | 0,672         | 1,483         | 0,757         |
| 7       | Complement factor B               | 6,17E-04                        | 3,61E-03         | 0,04 ± 0,03 | 0,09 ± 0,03 | 0,13 ± 0,05 | 0,09 ± 0,02 | 0,11 ± 0,05 | 0,14 ± 0,03 | <b>0,420</b> | <b>0,307</b>  | <b>0,448</b>   | <b>0,354</b>   | <b>0,282</b>   | 0,731        | 1,067        | 0,843         | <b>0,163</b> | 1,153         | 1,459         | 0,630         | 0,797         |
| 8       | Complement factor B               | 1,66E-04                        | 1,37E-03         | 0,07 ± 0,04 | 0,12 ± 0,02 | 0,15 ± 0,03 | 0,13 ± 0,02 | 0,12 ± 0,03 | 0,15 ± 0,04 | 0,517        | <b>0,442</b>  | <b>0,484</b>   | 0,534          | <b>0,422</b>   | 0,854        | 0,937        | 1,032         | <b>0,129</b> | 1,209         | 1,097         | 0,872         | 0,791         |
| 9       | Complement factor B               | 4,29E-03                        | 1,46E-02         | 0,02 ± 0,02 | 0,06 ± 0,03 | 0,07 ± 0,04 | 0,06 ± 0,02 | 0,04 ± 0,02 | 0,06 ± 0,03 | <b>0,371</b> | <b>0,295</b>  | <b>0,383</b>   | 0,605          | <b>0,356</b>   | 0,794        | 1,030        | 1,629         | 0,537        | <b>2,052</b>  | 1,297         | 0,931         | 0,588         |
| 10      | Serotransferrin                   | 2,16E-03                        | 8,71E-03         | 0,02 ± 0,01 | 0,04 ± 0,02 | 0,03 ± 0,01 | 0,02 ± 0,02 | 0,03 ± 0,01 | 0,03 ± 0,01 | <b>0,404</b> | 0,544         | 0,972          | 0,504          | 0,501          | 1,346        | <b>2,404</b> | 1,245         | <b>0,383</b> | 0,925         | 1,785         | 0,516         | 0,996         |
| 11      | Serotransferrin                   | 9,82E-05                        | 9,82E-04         | 0,04 ± 0,05 | 0,12 ± 0,04 | 0,1 ± 0,02  | 0,1 ± 0,02  | 0,09 ± 0,03 | 0,1 ± 0,02  | <b>0,293</b> | <b>0,366</b>  | <b>0,367</b>   | <b>0,374</b>   | <b>0,339</b>   | 1,249        | 1,253        | 1,276         | <b>0,384</b> | 1,022         | 1,003         | 0,924         | 0,907         |
| 12      |                                   | 9,74E-04                        | 4,89E-03         | 0           | 0,06 ± 0,04 | 0,07 ± 0,04 | 0,04 ± 0,02 | 0,05 ± 0,02 | 0,05 ± 0,04 | <b>0</b>     | <b>0</b>      | <b>0</b>       | <b>0</b>       | <b>0</b>       | 0,890        | 1,625        | 1,238         | 0,771        | 1,391         | 1,826         | 0,887         | 1,164         |
| 13      | Serotransferrin                   | 1,46E-04                        | 1,25E-03         | 0,19 ± 0,21 | 0,32 ± 0,1  | 0,36 ± 0,15 | 0,4 ± 0,09  | 0,44 ± 0,05 | 0,33 ± 0,1  | 0,591        | 0,512         | <b>0,471</b>   | <b>0,426</b>   | 0,567          | 0,867        | 0,796        | 0,720         | <b>0,297</b> | 0,831         | 0,919         | 1,204         | 1,330         |
| 14      | Albumin                           | 3,69E-04                        | 2,49E-03         | 0,06 ± 0,03 | 0,18 ± 0,07 | 0,2 ± 0,04  | 0,16 ± 0,07 | 0,12 ± 0,02 | 0,21 ± 0,1  | <b>0,304</b> | <b>0,272</b>  | <b>0,345</b>   | <b>0,449</b>   | <b>0,253</b>   | 0,893        | 1,134        | 1,476         | <b>0,314</b> | 1,654         | 1,270         | 0,732         | 0,562         |
| 15      | Albumin                           | 1,61E-05                        | 2,86E-04         | 0,09 ± 0,05 | 0,22 ± 0,07 | 0,27 ± 0,03 | 0,23 ± 0,1  | 0,16 ± 0,03 | 0,21 ± 0,02 | <b>0,405</b> | <b>0,337</b>  | <b>0,394</b>   | 0,585          | <b>0,437</b>   | 0,833        | 0,974        | 1,445         | <b>0,340</b> | 1,735         | 1,169         | 1,108         | 0,747         |
| 16      | Albumin                           | 1,19E-03                        | 5,62E-03         | 0,03 ± 0,03 | 0,08 ± 0,04 | 0,08 ± 0,06 | 0,13 ± 0,03 | 0,07 ± 0,02 | 0,08 ± 0,02 | <b>0,383</b> | <b>0,380</b>  | <b>0,238</b>   | <b>0,424</b>   | <b>0,382</b>   | 0,994        | 0,621        | 1,107         | <b>0,417</b> | 1,114         | 0,625         | 1,606         | 0,901         |
| 17      |                                   | 1,05E-02                        | 2,92E-02         | 0,01 ± 0,01 | 0,02 ± 0,02 | 0,01 ± 0,01 | 0,01 ± 0,01 | 0,04 ± 0,04 | 0,01 ± 0,01 | <b>0,041</b> | <b>0,090</b>  | <b>0,175</b>   | <b>0,023</b>   | <b>0,129</b>   | <b>2,219</b> | <b>4,308</b> | 0,571         | 1,808        | <b>0,257</b>  | 1,941         | 0,738         | <b>5,567</b>  |
| 18      | Complement factor B               | 2,93E-05                        | 4,32E-04         | 0,01 ± 0,01 | 0,04 ± 0,03 | 0,04 ± 0,02 | 0,02 ± 0,01 | 0,01 ± 0,01 | 0,01 ± 0,01 | <b>0,060</b> | <b>0,057</b>  | <b>0,163</b>   | <b>0,240</b>   | <b>0,235</b>   | 0,954        | <b>2,721</b> | <b>4,014</b>  | <b>2,500</b> | <b>4,209</b>  | <b>2,853</b>  | 1,447         | 0,981         |
| 19      | Albumin                           | 1,38E-03                        | 6,21E-03         | 0,11 ± 0,05 | 0,21 ± 0,07 | 0,23 ± 0,04 | 0,23 ± 0,1  | 0,17 ± 0,02 | 0,16 ± 0,01 | <b>0,495</b> | <b>0,443</b>  | <b>0,448</b>   | 0,628          | 0,651          | 0,895        | 0,904        | 1,268         | <b>0,399</b> | 1,416         | 1,010         | 1,453         | 1,036         |
| 20      | Albumin                           | 2,39E-04                        | 1,78E-03         | 0,04 ± 0,03 | 0,09 ± 0,04 | 0,08 ± 0,05 | 0,12 ± 0,03 | 0,09 ± 0,02 | 0,08 ± 0,01 | <b>0,364</b> | <b>0,429</b>  | <b>0,273</b>   | <b>0,375</b>   | <b>0,393</b>   | 1,179        | 0,750        | 1,033         | <b>0,424</b> | 0,876         | 0,636         | 1,443         | 1,048         |
| 21      | Albumin                           | 4,57E-04                        | 2,94E-03         | 0,06 ± 0,03 | 0,1 ± 0,03  | 0,11 ± 0,02 | 0,1 ± 0,04  | 0,1 ± 0,02  | 0,12 ± 0,04 | 0,561        | <b>0,476</b>  | 0,558          | 0,538          | <b>0,435</b>   | 0,848        | 0,994        | 0,959         | <b>0,250</b> | 1,130         | 1,172         | 0,780         | 0,809         |
| 22      | Leucine-rich alpha-2-glycoprotein | 2,16E-03                        | 8,71E-03         | 0,05 ± 0,02 | 0,02 ± 0,02 | 0,02 ± 0,01 | 0,02 ± 0,01 | 0,03 ± 0,02 | 0,04 ± 0,03 | <b>2,776</b> | <b>2,768</b>  | <b>2,280</b>   | 1,556          | 1,159          | 0,997        | 0,821        | 0,561         | <b>0,396</b> | 0,562         | 0,824         | 0,508         | 0,745         |
| 23      |                                   | 4,22E-03                        | 1,44E-02         | 0,02 ± 0,01 | 0,06 ± 0,04 | 0,07 ± 0,04 | 0,04 ± 0,03 | 0,06 ± 0,04 | 0,04 ± 0,03 | <b>0,303</b> | <b>0,223</b>  | <b>0,468</b>   | <b>0,297</b>   | <b>0,411</b>   | 0,735        | 1,544        | 0,977         | 0,806        | 1,330         | <b>2,101</b>  | 0,877         | 1,385         |
| 24      | Albumin                           | 1,41E-08                        | 2,19E-06         | 0,06 ± 0,03 | 0,12 ± 0,05 | 0,13 ± 0,03 | 0,08 ± 0,02 | 0,01 ± 0,02 | 0,07 ± 0,02 | <b>0,497</b> | <b>0,464</b>  | 0,761          | <b>12,823</b>  | 0,861          | 0,934        | 1,533        | <b>25,827</b> | 0,608        | <b>27,657</b> | 1,642         | 1,131         | <b>0,067</b>  |
| 25      |                                   | 2,23E-04                        | 1,69E-03         | 0,03 ± 0,02 | 0,05 ± 0,01 | 0,05 ± 0,02 | 0,05 ± 0,02 | 0,03 ± 0,01 | 0,03 ± 0,01 | <b>0,422</b> | <b>0,489</b>  | <b>0,441</b>   | 0,818          | 0,795          | 1,160        | 1,046        | 1,940         | <b>0,376</b> | 1,672         | 0,902         | 1,802         | 0,971         |
| 26      |                                   | 6,15E-06                        | 1,37E-04         | 0,03 ± 0,02 | 0,06 ± 0,03 | 0,07 ± 0,02 | 0,05 ± 0,01 | 0,04 ± 0,01 | 0,05 ± 0,01 | 0,517        | <b>0,468</b>  | 0,612          | 0,750          | 0,679          | 0,905        | 1,183        | 1,451         | 0,510        | 1,603         | 1,307         | 1,110         | 0,906         |
| 27      | Albumin                           | 3,47E-05                        | 4,96E-04         | 0,05 ± 0,02 | 0,1 ± 0,05  | 0,11 ± 0,03 | 0,08 ± 0,02 | 0,07 ± 0,01 | 0,07 ± 0,02 | <b>0,497</b> | <b>0,472</b>  | 0,629          | 0,783          | 0,731          | 0,949        | 1,266        | 1,576         | 0,644        | 1,660         | 1,333         | 1,162         | 0,933         |
| 28      | Albumin Fragment N                | 1,48E-05                        | 2,73E-04         | 0,05 ± 0,02 | 0,09 ± 0,04 | 0,11 ± 0,03 | 0,08 ± 0,03 | 0,07 ± 0,01 | 0,07 ± 0,01 | <b>0,492</b> | <b>0,425</b>  | 0,592          | 0,727          | 0,712          | 0,863        | 1,204        | 1,478         | 0,581        | 1,712         | 1,395         | 1,202         | 0,979         |
| 29      | Albumin Fragment N                | 1,14E-04                        | 1,07E-03         | 0,03 ± 0,02 | 0,06 ± 0,02 | 0,06 ± 0,02 | 0,05 ± 0,02 | 0,04 ± 0,01 | 0,04 ± 0,01 | 0,521        | <b>0,487</b>  | 0,679          | 0,827          | 0,810          | 0,934        | 1,303        | 1,587         | 0,527        | 1,700         | 1,396         | 1,192         | 0,979         |
| 30      | Immunoglobulin lambda constant 2  | 1,17E-02                        | 3,17E-02         | 0,08 ± 0,04 | 0,2 ± 0,07  | 0,21 ± 0,07 | 0,19 ± 0,13 | 0,13 ± 0,03 | 0,14 ± 0,02 | <b>0,364</b> | <b>0,340</b>  | <b>0,376</b>   | 0,553          | 0,537          | 0,934        | 1,034        | 1,521         | 0,525        | 1,628         | 1,107         | 1,426         | 0,970         |
| 31      |                                   | 4,27E-06                        | 1,10E-04         | 0,03 ± 0,02 | 0,11 ± 0,03 | 0,1 ± 0,04  | 0,11 ± 0,03 | 0,06 ± 0,02 | 0,06 ± 0,03 | <b>0,257</b> | <b>0,288</b>  | <b>0,256</b>   | 0,532          | <b>0,499</b>   | 1,117        | 0,995        | <b>2,066</b>  | 0,502        | 1,849         | 0,890         | 1,951         | 0,939         |
| 32      |                                   | 6,27E-03                        | 1,98E-02         | 0,08 ± 0,06 | 0,18 ± 0,15 | 0,26 ± 0,1  | 0,14 ± 0,08 | 0,11 ± 0,02 | 0,21 ± 0,17 | <b>0,402</b> | <b>0,283</b>  | 0,530          | 0,673          | <b>0,351</b>   | 0,704        | 1,319        | 1,674         | 0,687        | <b>2,380</b>  | 1,874         | 0,662         | 0,522         |

|    |                                        |          |          |             |             |             |             |             |             |              |              |              |              |              |              |              |              |              |              |              |              |              |
|----|----------------------------------------|----------|----------|-------------|-------------|-------------|-------------|-------------|-------------|--------------|--------------|--------------|--------------|--------------|--------------|--------------|--------------|--------------|--------------|--------------|--------------|--------------|
| 33 |                                        | 9,50E-03 | 2,72E-02 | 0,02 ± 0,02 | 0,05 ± 0,04 | 0,06 ± 0,03 | 0,03 ± 0,02 | 0,03 ± 0,01 | 0,06 ± 0,05 | <b>0,365</b> | <b>0,343</b> | 0,603        | 0,660        | <b>0,290</b> | 0,939        | 1,650        | 1,807        | 0,632        | 1,924        | 1,757        | <b>0,481</b> | <b>0,439</b> |
| 34 | Apolipoprotein C-III                   | 2,51E-06 | 8,09E-05 | 0,1 ± 0,04  | 0,05 ± 0,03 | 0,02 ± 0,02 | 0,06 ± 0,05 | 0,08 ± 0,03 | 0,14 ± 0,02 | <b>2,315</b> | <b>5,572</b> | 1,834        | 1,301        | 0,666        | <b>2,407</b> | 0,792        | 0,562        | <b>0,172</b> | <b>0,233</b> | <b>0,329</b> | <b>0,363</b> | 0,512        |
| 35 | Apolipoprotein C-III                   | 1,60E-05 | 2,86E-04 | 0,14 ± 0,08 | 0,05 ± 0,03 | 0,03 ± 0,02 | 0,05 ± 0,05 | 0,07 ± 0,02 | 0,14 ± 0,02 | <b>3,470</b> | <b>5,785</b> | <b>3,438</b> | <b>2,209</b> | 1,018        | 1,667        | 0,991        | 0,637        | <b>0,203</b> | <b>0,382</b> | 0,594        | <b>0,296</b> | <b>0,461</b> |
| 36 |                                        | 4,17E-05 | 5,61E-04 | 0,09 ± 0,04 | 0,05 ± 0,02 | 0,05 ± 0,02 | 0,04 ± 0,01 | 0,07 ± 0,02 | 0,08 ± 0,02 | 1,978        | 1,944        | <b>2,088</b> | 1,233        | 1,033        | 0,983        | 1,056        | 0,623        | <b>0,189</b> | 0,634        | 1,074        | <b>0,495</b> | 0,837        |
| 37 | Plasminogen                            | 2,28E-03 | 9,12E-03 | 0,02 ± 0,02 | 0,04 ± 0,02 | 0,03 ± 0,02 | 0,04 ± 0,02 | 0,03 ± 0,01 | 0,04 ± 0,01 | <b>0,358</b> | <b>0,399</b> | <b>0,302</b> | <b>0,402</b> | <b>0,292</b> | 1,115        | 0,844        | 1,125        | 0,521        | 1,009        | 0,757        | 0,967        | 0,725        |
| 38 | Plasminogen                            | 4,25E-02 | 1,53E-03 | 0,01 ± 0,01 | 0,04 ± 0,03 | 0,02 ± 0,02 | 0,03 ± 0,03 | 0,03 ± 0,03 | 0,04 ± 0,01 | <b>0,174</b> | <b>0,301</b> | <b>0,218</b> | <b>0,224</b> | <b>0,171</b> | 1,732        | 1,258        | 1,288        | 0,808        | 0,743        | 0,726        | 0,784        | 0,766        |
| 39 |                                        | 4,63E-05 | 6,06E-04 | 0,01 ± 0,01 | 0,02 ± 0,02 | 0,01 ± 0,01 | 0,03 ± 0,01 | 0,01 ± 0,01 | 0,02 ± 0,01 | <b>0,041</b> | <b>0,112</b> | <b>0,031</b> | <b>0,076</b> | <b>0,062</b> | <b>2,746</b> | 0,757        | 1,874        | 1,283        | 0,682        | <b>0,276</b> | 1,994        | 0,805        |
| 40 | Albumin                                | 1,20E-04 | 1,11E-03 | 0,03 ± 0,03 | 0,07 ± 0,02 | 0,08 ± 0,01 | 0,08 ± 0,03 | 0,05 ± 0,02 | 0,05 ± 0,01 | <b>0,351</b> | <b>0,291</b> | <b>0,314</b> | <b>0,475</b> | 0,557        | 0,829        | 0,895        | 1,355        | <b>0,400</b> | 1,634        | 1,079        | 1,775        | 1,172        |
| 41 | Alpha-2-macroglobulin                  | 1,96E-02 | 4,65E-02 | 0,04 ± 0,07 | 0,11 ± 0,07 | 0,19 ± 0,15 | 0,12 ± 0,08 | 0,04 ± 0,04 | 0,06 ± 0,03 | <b>0,306</b> | <b>0,178</b> | <b>0,280</b> | 1,046        | 0,648        | 0,581        | 0,917        | <b>3,420</b> | 1,191        | <b>5,881</b> | 1,578        | <b>2,311</b> | 0,620        |
| 42 | Plasminogen                            | 2,14E-02 | 4,96E-02 | 0,01 ± 0,01 | 0,03 ± 0,02 | 0,03 ± 0,02 | 0,02 ± 0,02 | 0,03 ± 0,02 | 0,04 ± 0,01 | <b>0,437</b> | <b>0,402</b> | 0,770        | <b>0,338</b> | <b>0,270</b> | 0,922        | 1,763        | 0,775        | <b>0,453</b> | 0,841        | 1,914        | <b>0,350</b> | 0,797        |
| 43 | Complement factor B                    | 4,73E-03 | 1,57E-02 | 0,02 ± 0,02 | 0,07 ± 0,04 | 0,08 ± 0,04 | 0,05 ± 0,02 | 0,06 ± 0,04 | 0,08 ± 0,02 | <b>0,203</b> | <b>0,168</b> | <b>0,260</b> | <b>0,230</b> | <b>0,167</b> | 0,829        | 1,282        | 1,132        | <b>0,441</b> | 1,364        | 1,546        | 0,643        | 0,728        |
| 44 | Complement factor B                    | 5,91E-03 | 1,90E-02 | 0,06 ± 0,03 | 0,1 ± 0,04  | 0,12 ± 0,04 | 0,13 ± 0,04 | 0,09 ± 0,02 | 0,13 ± 0,05 | 0,633        | 0,526        | <b>0,456</b> | 0,692        | <b>0,483</b> | 0,831        | 0,720        | 1,093        | <b>0,291</b> | 1,315        | 0,867        | 1,059        | 0,698        |
| 45 | Gelsolin                               | 4,82E-04 | 3,08E-03 | 0,05 ± 0,03 | 0,1 ± 0,05  | 0,15 ± 0,04 | 0,12 ± 0,05 | 0,1 ± 0,02  | 0,12 ± 0,03 | <b>0,426</b> | <b>0,275</b> | <b>0,341</b> | <b>0,423</b> | <b>0,365</b> | 0,645        | 0,800        | 0,993        | <b>0,370</b> | 1,539        | 1,240        | 1,071        | 0,863        |
| 46 | Albumin                                | 1,10E-02 | 3,02E-02 | 0,02 ± 0,02 | 0,05 ± 0,03 | 0,06 ± 0,02 | 0,07 ± 0,03 | 0,05 ± 0,01 | 0,05 ± 0,01 | <b>0,370</b> | <b>0,327</b> | <b>0,267</b> | <b>0,400</b> | <b>0,402</b> | 0,886        | 0,722        | 1,082        | 0,697        | 1,221        | 0,814        | 1,507        | 1,005        |
| 47 |                                        | 7,97E-04 | 4,36E-03 | 0,01 ± 0,01 | 0,03 ± 0,02 | 0,03 ± 0,02 | 0,02 ± 0,01 | 0,04 ± 0,01 | 0,03 ± 0,02 | <b>0,090</b> | <b>0,106</b> | <b>0,125</b> | <b>0,078</b> | <b>0,079</b> | 1,178        | 1,393        | 0,869        | <b>0,439</b> | 0,737        | 1,182        | 0,629        | 1,008        |
| 48 | Albumin                                | 2,11E-02 | 4,91E-02 | 0,05 ± 0,04 | 0,09 ± 0,03 | 0,11 ± 0,03 | 0,09 ± 0,03 | 0,13 ± 0,05 | 0,1 ± 0,05  | 0,536        | <b>0,430</b> | 0,540        | <b>0,368</b> | 0,508        | 0,803        | 1,007        | 0,687        | <b>0,279</b> | 0,856        | 1,254        | 0,941        | 1,379        |
| 49 | Albumin                                | 1,98E-02 | 4,68E-02 | 0,07 ± 0,05 | 0,11 ± 0,07 | 0,13 ± 0,06 | 0,11 ± 0,06 | 0,05 ± 0,03 | 0,04 ± 0,02 | 0,595        | <b>0,481</b> | 0,570        | 1,271        | 1,617        | 0,809        | 0,959        | <b>2,137</b> | 1,708        | <b>2,641</b> | 1,185        | <b>2,835</b> | 1,272        |
| 51 | Albumin Fragment C                     | 1,53E-02 | 3,87E-02 | 0,09 ± 0,04 | 0,15 ± 0,05 | 0,2 ± 0,05  | 0,16 ± 0,08 | 0,15 ± 0,03 | 0,15 ± 0,02 | 0,613        | <b>0,453</b> | 0,583        | 0,601        | 0,626        | 0,739        | 0,951        | 0,979        | <b>0,321</b> | 1,326        | 1,287        | 1,074        | 1,042        |
| 52 | Albumin                                | 1,98E-04 | 1,56E-03 | 0,03 ± 0,03 | 0,06 ± 0,03 | 0,05 ± 0,03 | 0,08 ± 0,03 | 0,08 ± 0,01 | 0,08 ± 0,02 | <b>0,439</b> | <b>0,498</b> | <b>0,312</b> | <b>0,338</b> | <b>0,340</b> | 1,134        | 0,710        | 0,771        | <b>0,286</b> | 0,680        | 0,626        | 1,090        | 1,003        |
| 53 | Albumin                                | 3,14E-04 | 2,21E-03 | 0,03 ± 0,03 | 0,04 ± 0,02 | 0,05 ± 0,01 | 0,04 ± 0,02 | 0,03 ± 0,02 | 0,04 ± 0,02 | 0,565        | <b>0,488</b> | 0,549        | 0,873        | 0,652        | 0,863        | 0,971        | 1,544        | <b>0,358</b> | 1,789        | 1,126        | 1,188        | 0,747        |
| 54 |                                        | 1,54E-02 | 3,89E-02 | 0,15 ± 0,08 | 0,26 ± 0,09 | 0,33 ± 0,14 | 0,15 ± 0,07 | 0,22 ± 0,08 | 0,23 ± 0,08 | 0,559        | <b>0,440</b> | 0,997        | 0,652        | 0,640        | 0,788        | 1,785        | 1,167        | <b>0,371</b> | 1,482        | <b>2,267</b> | 0,642        | 0,982        |
| 55 | Transthyretin                          | 2,79E-06 | 8,45E-05 | 0,08 ± 0,08 | 0,33 ± 0,11 | 0,4 ± 0,17  | 0,47 ± 0,05 | 0,25 ± 0,05 | 0,29 ± 0,12 | <b>0,240</b> | <b>0,196</b> | <b>0,166</b> | <b>0,315</b> | <b>0,272</b> | 0,815        | 0,690        | 1,314        | <b>0,358</b> | 1,611        | 0,847        | 1,643        | 0,863        |
| 56 | Apolipoprotein C-II                    | 2,56E-05 | 3,98E-04 | 0,05 ± 0,03 | 0,02 ± 0,02 | 0,01 ± 0,01 | 0,03 ± 0,01 | 0,05 ± 0,02 | 0,08 ± 0,02 | <b>2,593</b> | <b>5,484</b> | 1,984        | 1,214        | 0,687        | <b>2,115</b> | 0,765        | <b>0,468</b> | <b>0,228</b> | <b>0,221</b> | <b>0,362</b> | <b>0,346</b> | 0,566        |
| 57 | Ceruloplasmin                          | 9,05E-05 | 9,53E-04 | 0,02 ± 0,01 | 0,02 ± 0,01 | 0,01 ± 0,01 | 0,04 ± 0,02 | 0,04 ± 0,01 | 0,04 ± 0,01 | 1,279        | 1,612        | <b>0,418</b> | <b>0,448</b> | <b>0,463</b> | 1,260        | <b>0,327</b> | <b>0,350</b> | <b>0,239</b> | <b>0,278</b> | <b>0,259</b> | 1,108        | 1,035        |
| 58 |                                        | 1,14E-02 | 3,11E-02 | 0,02 ± 0,03 | 0,01 ± 0,01 | 0           | 0,01 ± 0,01 | 0,02 ± 0,01 | 0,04 ± 0,02 | <b>3,215</b> | -            | <b>2,245</b> | 1,015        | 0,557        | -            | 0,698        | <b>0,316</b> | <b>0,249</b> | <b>0</b>     | <b>0</b>     | <b>0,248</b> | 0,548        |
| 59 |                                        | 2,01E-03 | 8,26E-03 | 0,02 ± 0,02 | 0,01 ± 0,01 | 0,01 ± 0,01 | 0,01 ± 0,01 | 0           | 0           | <b>2,115</b> | <b>2,935</b> | <b>8,017</b> | -            | -            | 1,387        | <b>3,790</b> | -            | -            | -            | <b>2,732</b> | -            | -            |
| 60 |                                        | 2,05E-06 | 7,22E-05 | 0           | 0,07 ± 0,02 | 0,08 ± 0,04 | 0,03 ± 0,02 | 0,06 ± 0,02 | 0,08 ± 0,03 | <b>0</b>     | <b>0</b>     | <b>0</b>     | <b>0</b>     | <b>0</b>     | 0,900        | <b>3,172</b> | 1,146        | <b>0,227</b> | 1,273        | <b>3,523</b> | <b>0,282</b> | 0,782        |
| 61 | Alpha-1-antichymotrypsin + vitronectin | 6,18E-03 | 1,97E-02 | 0,06 ± 0,08 | 0,02 ± 0,03 | 0,04 ± 0,01 | 0,05 ± 0,01 | 0,09 ± 0,03 | 0           | <b>3,742</b> | 1,560        | 1,293        | 0,633        | -            | <b>0,417</b> | <b>0,346</b> | <b>0,169</b> | -            | <b>0,406</b> | 0,829        | -            | -            |
| 62 |                                        | 1,02E-04 | 1,01E-03 | 0,01 ± 0,01 | 0,02 ± 0,02 | 0,03 ± 0,01 | 0,01 ± 0,01 | 0,01 ± 0,01 | 0,01 ± 0,01 | <b>0,305</b> | <b>0,266</b> | 0,621        | 1,159        | 0,936        | 0,871        | <b>2,037</b> | <b>3,801</b> | 1,840        | <b>4,362</b> | <b>2,338</b> | 1,508        | 0,808        |
| 63 |                                        | 5,96E-07 | 3,09E-05 | 0           | 0,02 ± 0,02 | 0,03 ± 0,02 | 0           | 0           | 0           | <b>0</b>     | <b>0</b>     | -            | -            | -            | 0,621        | -            | -            | -            | -            | -            | -            | -            |
| 64 | Albumin                                | 3,01E-04 | 2,13E-03 | 0,09 ± 0,08 | 0,21 ± 0,08 | 0,21 ± 0,05 | 0,16 ± 0,05 | 0,09 ± 0,02 | 0,06 ± 0,02 | <b>0,421</b> | <b>0,427</b> | 0,570        | 0,993        | 1,556        | 1,014        | 1,353        | <b>2,358</b> | 1,263        | <b>2,326</b> | 1,334        | <b>2,731</b> | 1,566        |
| 65 | Albumin                                | 3,77E-08 | 4,51E-06 | 0,03 ± 0,03 | 0,07 ± 0,03 | 0           | 0,06 ± 0,02 | 0           | 0           | <b>0,416</b> | -            | <b>0,465</b> | -            | -            | -            | 1,116        | -            | -            | -            | <b>0</b>     | -            | -            |
| 66 |                                        | 1,83E-06 | 6,75E-05 | 0,08 ± 0,04 | 0,11 ± 0,04 | 0,12 ± 0,03 | 0,07 ± 0,02 | 0,05 ± 0,05 | 0,02 ± 0,03 | 0,723        | 0,662        | 1,138        | 1,716        | <b>6,738</b> | 0,916        | 1,574        | <b>2,373</b> | <b>2,788</b> | <b>2,592</b> | 1,719        | <b>5,922</b> | <b>3,927</b> |
| 67 | Albumin Fragment C                     | 8,23E-04 | 4,42E-03 | 0,03 ± 0,02 | 0,07 ± 0,03 | 0,09 ± 0,03 | 0,08 ± 0,04 | 0,02 ± 0,02 | 0,04 ± 0,02 | <b>0,401</b> | <b>0,333</b> | <b>0,378</b> | 1,427        | 0,881        | 0,830        | 0,943        | <b>3,559</b> | 0,979        | <b>4,285</b> | 1,135        | <b>2,329</b> | 0,617        |
| 68 |                                        | 8,78E-05 | 9,40E-04 | 0,02 ± 0,01 | 0,05 ± 0,02 | 0,04 ± 0,02 | 0,04 ± 0,02 | 0,02 ± 0,01 | 0,03 ± 0,01 | <b>0,346</b> | <b>0,394</b> | <b>0,407</b> | 0,829        | 0,688        | 1,138        | 1,176        | <b>2,396</b> | 0,724        | <b>2,106</b> | 1,034        | 1,691        | 0,831        |

|    |                                  |          |          |             |             |             |             |             |             |              |              |              |              |              |              |              |              |              |              |              |              |              |
|----|----------------------------------|----------|----------|-------------|-------------|-------------|-------------|-------------|-------------|--------------|--------------|--------------|--------------|--------------|--------------|--------------|--------------|--------------|--------------|--------------|--------------|--------------|
| 69 | Immunoglobulin lambda constant 2 | 4,94E-04 | 3,12E-03 | 0,2 ± 0,07  | 0,36 ± 0,16 | 0,45 ± 0,07 | 0,34 ± 0,18 | 0,18 ± 0,07 | 0,17 ± 0,03 | 0,559        | <b>0,445</b> | 0,593        | 1,151        | 1,238        | 0,797        | 1,061        | <b>2,059</b> | 0,939        | <b>2,583</b> | 1,332        | <b>2,088</b> | 1,076        |
| 70 | Ceruloplasmin                    | 1,19E-03 | 5,62E-03 | 0,03 ± 0,02 | 0,03 ± 0,02 | 0,03 ± 0,02 | 0,06 ± 0,03 | 0,05 ± 0,02 | 0,05 ± 0,02 | 1,119        | 1,231        | <b>0,489</b> | 0,522        | 0,554        | 1,100        | <b>0,437</b> | <b>0,466</b> | <b>0,284</b> | <b>0,424</b> | <b>0,397</b> | 1,134        | 1,062        |
| 71 | Alpha-1-antichymotrypsin         | 1,92E-04 | 3,50E-03 | 0,04 ± 0,05 | 0,02 ± 0,03 | 0,02 ± 0,02 | 0,03 ± 0,01 | 0,05 ± 0,02 | 0,04 ± 0,02 | <b>2,156</b> | <b>3,109</b> | 1,477        | 0,874        | 0,954        | 1,442        | 0,685        | <b>0,405</b> | 0,504        | <b>0,281</b> | <b>0,475</b> | 0,646        | 1,091        |
| 72 |                                  | 6,41E-11 | 2,99E-08 | 0           | 0,01 ± 0,01 | 0,01 ± 0,01 | 0,01 ± 0,01 | 0,03 ± 0,01 | 0,04 ± 0,02 | <b>0</b>     | <b>0</b>     | <b>0</b>     | <b>0</b>     | <b>0</b>     | <b>2,143</b> | 1,913        | <b>0,122</b> | <b>0,113</b> | <b>0,057</b> | 0,893        | <b>0,050</b> | 0,788        |
| 73 | Apolipoprotein A-I               | 1,71E-02 | 4,17E-02 | 0,07 ± 0,05 | 0,03 ± 0,01 | 0,03 ± 0,02 | 0,02 ± 0,01 | 0,06 ± 0,04 | 0,07 ± 0,03 | <b>2,867</b> | <b>2,770</b> | <b>4,454</b> | 1,027        | 0,960        | 0,966        | 1,553        | <b>0,358</b> | <b>0,107</b> | <b>0,371</b> | 1,608        | <b>0,215</b> | 0,934        |
| 74 | Alpha-1-antichymotrypsin         | 7,50E-03 | 2,24E-02 | 0,11 ± 0,09 | 0,05 ± 0,05 | 0,1 ± 0,02  | 0,05 ± 0,03 | 0,08 ± 0,03 | 0,17 ± 0,06 | <b>2,303</b> | 1,149        | <b>2,367</b> | 1,327        | 0,632        | <b>0,499</b> | 1,028        | 0,577        | <b>0,281</b> | 1,155        | <b>2,060</b> | <b>0,267</b> | <b>0,476</b> |
| 75 | Albumin                          | 3,93E-04 | 6,11E-03 | 0,03 ± 0,02 | 0,03 ± 0,01 | 0,03 ± 0,01 | 0,02 ± 0,01 | 0,04 ± 0,02 | 0,04 ± 0,01 | 0,817        | 0,769        | 1,149        | 0,599        | 0,516        | 0,941        | 1,406        | 0,733        | <b>0,170</b> | 0,779        | 1,494        | <b>0,449</b> | 0,861        |
| 76 | Albumin Fragment C               | 1,24E-14 | 8,68E-12 | 0,01 ± 0,01 | 0,02 ± 0,01 | 0           | 0,01 ± 0,01 | 0,07 ± 0,02 | 0,06 ± 0,02 | <b>0,131</b> | -            | <b>0,160</b> | <b>0,021</b> | <b>0,024</b> | -            | 1,221        | <b>0,163</b> | <b>0,104</b> | <b>0</b>     | <b>0</b>     | <b>0,148</b> | 1,102        |
| 77 |                                  | 1,80E-03 | 2,65E-02 | 0,02 ± 0,03 | 0,02 ± 0,01 | 0,03 ± 0,01 | 0,02 ± 0,01 | 0,03 ± 0,02 | 0,04 ± 0,02 | 0,880        | 0,505        | 0,933        | 0,577        | <b>0,338</b> | 0,574        | 1,060        | 0,656        | <b>0,199</b> | 1,144        | 1,848        | <b>0,362</b> | 0,585        |
| 78 | Transthyretin                    | 6,01E-05 | 7,14E-04 | 0           | 0,02 ± 0,02 | 0,02 ± 0,01 | 0,01 ± 0,01 | 0,04 ± 0,02 | 0,05 ± 0,02 | <b>0</b>     | <b>0</b>     | <b>0</b>     | <b>0</b>     | <b>0</b>     | 0,865        | 1,626        | <b>0,488</b> | <b>0,376</b> | 0,565        | 1,880        | <b>0,201</b> | 0,668        |
| 79 | Apolipoprotein A-I               | 1,53E-03 | 6,68E-03 | 0,19 ± 0,09 | 0,15 ± 0,04 | 0,14 ± 0,04 | 0,12 ± 0,01 | 0,24 ± 0,05 | 0,25 ± 0,07 | 1,273        | 1,386        | 1,554        | 0,787        | 0,760        | 1,089        | 1,221        | 0,619        | <b>0,143</b> | 0,568        | 1,121        | <b>0,489</b> | 0,965        |
| 80 |                                  | 4,57E-04 | 2,94E-03 | 0,02 ± 0,02 | 0,02 ± 0,01 | 0,01 ± 0,01 | 0,01 ± 0,01 | 0,03 ± 0,01 | 0,03 ± 0,01 | 1,038        | 1,487        | <b>4,145</b> | 0,575        | 0,648        | 1,433        | <b>3,994</b> | 0,554        | <b>0,371</b> | <b>0,387</b> | <b>2,788</b> | <b>0,156</b> | 1,127        |
| 81 | Immunoglobulin J chain           | 2,91E-03 | 3,57E-02 | 0,01 ± 0,01 | 0,01 ± 0,01 | 0,01 ± 0,01 | 0,01 ± 0,01 | 0,02 ± 0,01 | 0,02 ± 0,01 | <b>2,205</b> | 1,639        | <b>2,715</b> | 0,724        | 0,596        | 0,743        | 1,231        | <b>0,328</b> | <b>0,365</b> | <b>0,442</b> | 1,657        | <b>0,220</b> | 0,823        |
| 82 | Transthyretin                    | 4,31E-06 | 1,10E-04 | 0,13 ± 0,06 | 0,09 ± 0,03 | 0,08 ± 0,02 | 0,08 ± 0,02 | 0,16 ± 0,04 | 0,21 ± 0,03 | 1,414        | 1,569        | 1,607        | 0,795        | 0,605        | 1,109        | 1,137        | 0,562        | <b>0,139</b> | 0,507        | 1,025        | <b>0,376</b> | 0,760        |

**Supplementary Table S1:** Kruskal Wallis and Dunn's test statistical analysis of protein profiles, showing spot numbers, protein names, means and standard deviations (%V) and ratios of the mean %V, of CTRL, T0, T1M, T1B, T6M and T6B serum samples. Numbers in bold font indicate a statistically valid ratio.
